# Supplementary material for: Selection Criteria for Improving Yield in Chili (Capsicum annuum)
Source: Hindawi journal article supplement (doi:10.1155/2017/5437870), 2017-01-01
Supplement: f1 [file 5437870.f1.pdf]

Statistical Tool for Agricultural Research (STAR)  
Thu Nov 17 16:26:22 2016

Analysis of Variance  
Randomized Complete Block Design

=====

**ANALYSIS FOR RESPONSE VARIABLE: DFP**

=====

Summary Information

-----

| FACTOR      | NO. OF LEVELS | LEVELS        |
|-------------|---------------|---------------|
| Genotypes   | 20            | 1, 2, ..., 20 |
| Replication | 3             | 1, 2, 3       |

-----

Number of Observations Read and Used: 60

ANOVA TABLE

Response Variable: DFP

-----

| Source      | DF | Sum of Square | Mean Square | F Value | Pr(> F) |
|-------------|----|---------------|-------------|---------|---------|
| Replication | 2  | 126.4333      | 63.2167     | 11.28   | 0.0001  |
| Genotypes   | 19 | 4317.0000     | 227.2105    | 40.55   | 0.0000  |
| Error       | 38 | 212.9000      | 5.6026      |         |         |
| Total       | 59 | 4656.3333     |             |         |         |

-----

Summary Statistics

-----

| CV(%)       | DFP Mean      |
|-------------|---------------|
| <b>1.88</b> | <b>126.17</b> |

-----

Standard Errors

-----

| Effects     | StdErr |
|-------------|--------|
| Replication | 0.75   |
| Genotypes   | 1.93   |

-----

Pairwise Mean Comparison of Genotypes

Tukeys's Honest Significant Difference (HSD) Test

|                          |        |
|--------------------------|--------|
| Alpha                    | 0.05   |
| Error Degrees of Freedom | 38     |
| Error Mean Square        | 5.6026 |
| Critical Value           | 5.3760 |

Test Statistics

7.3467

Summary of the Result:

```

-----
Genotypes      means      N group
-----
1              112.67      3      i
2              111.00      3      i
3              115.00      3      hi
4              130.67      3      bcd
5              132.00      3      bc
6              133.00      3      bc
7              121.67      3      fgh
8              137.33      3      b
9              117.33      3      ghi
10             123.33      3      defg
11             147.00      3      a
12             129.33      3      cde
13             133.33      3      bc
14             132.00      3      bc
15             124.33      3      defg
16             123.00      3      efg
17             121.00      3      fgh
18             126.00      3      cdef
19             126.67      3      cdef
20             126.67      3      cdef
-----

```

Means with the same letter are not significantly different.

```

=====
ANALYSIS FOR RESPONSE VARIABLE: HD
=====

```

Summary Information

```

-----
FACTOR          NO. OF LEVELS  LEVELS
-----
Genotypes       20              1, 2, ..., 20
Replication     3                1, 2, 3
-----

```

Number of Observations Read and Used: 60

ANOVA TABLE  
Response Variable: HD

```

-----
Source          DF   Sum of Square  Mean Square  F Value  Pr(> F)
-----
Replication     2         1.9000         0.9500       0.11    0.8932
Genotypes       19        2470.7333        130.0386     15.50    0.0000
Error           38         318.7667         8.3886
Total           59        2791.4000
-----

```

Summary Statistics

| CV(%) | HD Mean      |
|-------|--------------|
| 5.26  | <b>55.10</b> |

Standard Errors

| Effects     | StdErr |
|-------------|--------|
| Replication | 0.92   |
| Genotypes   | 2.36   |

Pairwise Mean Comparison of Genotypes

Tukey's Honest Significant Difference (HSD) Test

|                          |        |
|--------------------------|--------|
| Alpha                    | 0.05   |
| Error Degrees of Freedom | 38     |
| Error Mean Square        | 8.3886 |
| Critical Value           | 5.3760 |
| Test Statistics          | 8.9896 |

Summary of the Result:

| Genotypes | means | N | group |
|-----------|-------|---|-------|
| 1         | 57.33 | 3 | bcde  |
| 2         | 54.33 | 3 | cdef  |
| 3         | 54.67 | 3 | cdef  |
| 4         | 67.33 | 3 | a     |
| 5         | 43.33 | 3 | g     |
| 6         | 48.67 | 3 | efg   |
| 7         | 62.67 | 3 | abc   |
| 8         | 49.33 | 3 | efg   |
| 9         | 56.33 | 3 | cde   |
| 10        | 47.33 | 3 | fg    |
| 11        | 52.67 | 3 | def   |
| 12        | 56.33 | 3 | cde   |
| 13        | 49.33 | 3 | efg   |
| 14        | 46.00 | 3 | fg    |
| 15        | 52.00 | 3 | defg  |
| 16        | 60.00 | 3 | abcd  |
| 17        | 65.33 | 3 | ab    |
| 18        | 61.67 | 3 | abc   |
| 19        | 57.00 | 3 | bcde  |
| 20        | 60.33 | 3 | abcd  |

Means with the same letter are not significantly different.

=====

**ANALYSIS FOR RESPONSE VARIABLE: FFM**

=====

Summary Information

| FACTOR      | NO. OF LEVELS | LEVELS        |
|-------------|---------------|---------------|
| Genotypes   | 20            | 1, 2, ..., 20 |
| Replication | 3             | 1, 2, 3       |

Number of Observations Read and Used: 60

ANOVA TABLE

Response Variable: FFM

| Source      | DF | Sum of Square | Mean Square | F Value | Pr(> F) |
|-------------|----|---------------|-------------|---------|---------|
| Replication | 2  | 3.0333        | 1.5167      | 0.34    | 0.7112  |
| Genotypes   | 19 | 2620.3167     | 137.9114    | 31.26   | 0.0000  |
| Error       | 38 | 167.6333      | 4.4114      |         |         |
| Total       | 59 | 2790.9833     |             |         |         |

Summary Statistics

| CV(%)       | FFM Mean      |
|-------------|---------------|
| <b>1.54</b> | <b>135.98</b> |

Standard Errors

| Effects     | StdErr |
|-------------|--------|
| Replication | 0.66   |
| Genotypes   | 1.71   |

Pairwise Mean Comparison of Genotypes

Tukeys's Honest Significant Difference (HSD) Test

|                          |        |
|--------------------------|--------|
| Alpha                    | 0.05   |
| Error Degrees of Freedom | 38     |
| Error Mean Square        | 4.4114 |
| Critical Value           | 5.3760 |
| Test Statistics          | 6.5191 |

Summary of the Result:

| Genotypes | means  | N | group |
|-----------|--------|---|-------|
| 1         | 129.00 | 3 | ij    |
| 2         | 127.33 | 3 | j     |
| 3         | 130.00 | 3 | hij   |
| 4         | 133.00 | 3 | fghij |
| 5         | 137.33 | 3 | cdefg |
| 6         | 136.33 | 3 | defgh |
| 7         | 127.33 | 3 | j     |
| 8         | 139.00 | 3 | cdef  |
| 9         | 132.00 | 3 | ghij  |
| 10        | 131.00 | 3 | ghij  |
| 11        | 154.33 | 3 | a     |
| 12        | 134.33 | 3 | efghi |
| 13        | 143.00 | 3 | bc    |
| 14        | 146.33 | 3 | b     |
| 15        | 137.33 | 3 | cdefg |
| 16        | 137.00 | 3 | cdefg |
| 17        | 131.00 | 3 | ghij  |
| 18        | 132.67 | 3 | fghij |
| 19        | 141.00 | 3 | bcd   |
| 20        | 140.33 | 3 | bcde  |

Means with the same letter are not significantly different.

ANALYSIS FOR RESPONSE VARIABLE: HFM

Summary Information

| FACTOR      | NO. OF LEVELS | LEVELS        |
|-------------|---------------|---------------|
| Genotypes   | 20            | 1, 2, ..., 20 |
| Replication | 3             | 1, 2, 3       |

Number of Observations Read and Used: 60

ANOVA TABLE

Response Variable: HFM

| Source      | DF | Sum of Square | Mean Square | F Value | Pr(> F) |
|-------------|----|---------------|-------------|---------|---------|
| Replication | 2  | 133.4333      | 66.7167     | 14.75   | 0.0000  |
| Genotypes   | 19 | 4294.8500     | 226.0447    | 49.97   | 0.0000  |
| Error       | 38 | 171.9000      | 4.5237      |         |         |
| Total       | 59 | 4600.1833     |             |         |         |

Summary Statistics

| CV(%) | HFM Mean |
|-------|----------|
| 1.18  | 179.78   |

Standard Errors

| Effects     | StdErr |
|-------------|--------|
| Replication | 0.67   |
| Genotypes   | 1.74   |

Pairwise Mean Comparison of Genotypes

Tukeys's Honest Significant Difference (HSD) Test

|                          |        |
|--------------------------|--------|
| Alpha                    | 0.05   |
| Error Degrees of Freedom | 38     |
| Error Mean Square        | 4.5237 |
| Critical Value           | 5.3760 |
| Test Statistics          | 6.6015 |

Summary of the Result:

| Genotypes | means  | N | group |
|-----------|--------|---|-------|
| 1         | 168.33 | 3 | hi    |
| 2         | 164.67 | 3 | i     |
| 3         | 168.33 | 3 | hi    |
| 4         | 196.33 | 3 | a     |
| 5         | 175.00 | 3 | efg   |
| 6         | 179.00 | 3 | cdef  |
| 7         | 180.00 | 3 | bcde  |
| 8         | 185.00 | 3 | bc    |
| 9         | 173.33 | 3 | fgh   |
| 10        | 170.00 | 3 | ghi   |
| 11        | 197.33 | 3 | a     |
| 12        | 185.00 | 3 | bc    |
| 13        | 182.00 | 3 | bcd   |
| 14        | 178.00 | 3 | def   |
| 15        | 174.33 | 3 | efgh  |
| 16        | 182.67 | 3 | bcd   |
| 17        | 184.67 | 3 | bc    |
| 18        | 186.33 | 3 | b     |
| 19        | 180.00 | 3 | bcde  |
| 20        | 185.33 | 3 | bc    |

Means with the same letter are not significantly different.

=====

**ANALYSIS FOR RESPONSE VARIABLE: PH**

=====

Summary Information

| FACTOR      | NO. OF LEVELS | LEVELS        |
|-------------|---------------|---------------|
| Genotypes   | 20            | 1, 2, ..., 20 |
| Replication | 3             | 1, 2, 3       |

Number of Observations Read and Used: 60

ANOVA TABLE

Response Variable: PH

| Source      | DF | Sum of Square | Mean Square | F Value | Pr(> F) |
|-------------|----|---------------|-------------|---------|---------|
| Replication | 2  | 190.4779      | 95.2389     | 1.54    | 0.2265  |
| Genotypes   | 19 | 11344.7983    | 597.0946    | 9.68    | 0.0000  |
| Error       | 38 | 2343.0677     | 61.6597     |         |         |
| Total       | 59 | 13878.3439    |             |         |         |

Summary Statistics

| CV(%)        | PH Mean      |
|--------------|--------------|
| <b>11.00</b> | <b>71.36</b> |

Standard Errors

| Effects     | StdErr |
|-------------|--------|
| Replication | 2.48   |
| Genotypes   | 6.41   |

Pairwise Mean Comparison of Genotypes

Tukeys's Honest Significant Difference (HSD) Test

|                          |         |
|--------------------------|---------|
| Alpha                    | 0.05    |
| Error Degrees of Freedom | 38      |
| Error Mean Square        | 61.6597 |
| Critical Value           | 5.3760  |
| Test Statistics          | 24.3724 |

Summary of the Result:

| Genotypes | means | N | group |
|-----------|-------|---|-------|
| 1         | 44.60 | 3 | d     |
| 2         | 50.75 | 3 | cd    |
| 3         | 53.42 | 3 | cd    |
| 4         | 85.67 | 3 | ab    |
| 5         | 93.72 | 3 | a     |
| 6         | 82.27 | 3 | ab    |
| 7         | 86.22 | 3 | ab    |
| 8         | 45.12 | 3 | d     |
| 9         | 72.08 | 3 | abc   |
| 10        | 80.47 | 3 | ab    |
| 11        | 78.33 | 3 | ab    |
| 12        | 71.63 | 3 | abc   |
| 13        | 73.67 | 3 | abc   |
| 14        | 78.90 | 3 | ab    |
| 15        | 65.48 | 3 | bcd   |
| 16        | 86.26 | 3 | ab    |
| 17        | 66.80 | 3 | bcd   |
| 18        | 68.10 | 3 | bcd   |
| 19        | 79.03 | 3 | ab    |
| 20        | 64.67 | 3 | bcd   |

Means with the same letter are not significantly different.

ANALYSIS FOR RESPONSE VARIABLE: NPB

Summary Information

| FACTOR      | NO. OF LEVELS | LEVELS        |
|-------------|---------------|---------------|
| Genotypes   | 20            | 1, 2, ..., 20 |
| Replication | 3             | 1, 2, 3       |

Number of Observations Read and Used: 60

ANOVA TABLE

Response Variable: NPB

| Source      | DF | Sum of Square | Mean Square | F Value | Pr(> F) |
|-------------|----|---------------|-------------|---------|---------|
| Replication | 2  | 26.5333       | 13.2667     | 2.20    | 0.1251  |
| Genotypes   | 19 | 355.3333      | 18.7018     | 3.10    | 0.0015  |
| Error       | 38 | 229.4667      | 6.0386      |         |         |
| Total       | 59 | 611.3333      |             |         |         |

Summary Statistics



| CV(%) | NPB Mean |
|-------|----------|
| 17.14 | 14.33    |

Standard Errors

| Effects     | StdErr |
|-------------|--------|
| Replication | 0.78   |
| Genotypes   | 2.01   |

Pairwise Mean Comparison of Genotypes

Tukeys's Honest Significant Difference (HSD) Test

|                          |        |
|--------------------------|--------|
| Alpha                    | 0.05   |
| Error Degrees of Freedom | 38     |
| Error Mean Square        | 6.0386 |
| Critical Value           | 5.3760 |
| Test Statistics          | 7.6272 |

Summary of the Result:

| Genotypes | means | N group |
|-----------|-------|---------|
| 1         | 16.67 | 3 ab    |
| 2         | 12.00 | 3 ab    |
| 3         | 13.33 | 3 ab    |
| 4         | 14.33 | 3 ab    |
| 5         | 16.33 | 3 ab    |
| 6         | 13.67 | 3 ab    |
| 7         | 14.33 | 3 ab    |
| 8         | 18.00 | 3 ab    |
| 9         | 13.33 | 3 ab    |
| 10        | 10.67 | 3 b     |
| 11        | 19.00 | 3 a     |
| 12        | 14.33 | 3 ab    |
| 13        | 17.00 | 3 ab    |
| 14        | 11.67 | 3 ab    |
| 15        | 12.00 | 3 ab    |
| 16        | 12.67 | 3 ab    |
| 17        | 12.33 | 3 ab    |
| 18        | 11.67 | 3 ab    |
| 19        | 18.67 | 3 a     |
| 20        | 14.67 | 3 ab    |

Means with the same letter are not significantly different.

ANALYSIS FOR RESPONSE VARIABLE: X10.EFW

=====  
 Summary Information  
 -----

| FACTOR      | NO. OF LEVELS | LEVELS        |
|-------------|---------------|---------------|
| Genotypes   | 20            | 1, 2, ..., 20 |
| Replication | 3             | 1, 2, 3       |

-----  
 Number of Observations Read and Used: 60

ANOVA TABLE

Response Variable: X10.EFW  
 -----

| Source      | DF | Sum of Square | Mean Square | F Value | Pr(> F) |
|-------------|----|---------------|-------------|---------|---------|
| Replication | 2  | 152.7787      | 76.3893     | 0.35    | 0.7078  |
| Genotypes   | 19 | 383739.4449   | 20196.8129  | 92.20   | 0.0000  |
| Error       | 38 | 8324.2357     | 219.0588    |         |         |
| Total       | 59 | 392216.4593   |             |         |         |

-----  
 Summary Statistics  
 -----

CV(%)    X10.EFW Mean

**21.51**                    **68.80**  
 -----

Standard Errors  
 -----

Effects                    StdErr  
 -----

Replication                4.68

Genotypes                 12.08  
 -----

Pairwise Mean Comparison of Genotypes

Tukeys's Honest Significant Difference (HSD) Test

|                          |          |
|--------------------------|----------|
| Alpha                    | 0.05     |
| Error Degrees of Freedom | 38       |
| Error Mean Square        | 219.0588 |
| Critical Value           | 5.3760   |
| Test Statistics          | 45.9385  |

Summary of the Result:

| Genotypes | means  | N | group |
|-----------|--------|---|-------|
| 1         | 240.29 | 3 | ab    |
| 2         | 214.42 | 3 | b     |
| 3         | 272.93 | 3 | a     |
| 4         | 26.97  | 3 | fg    |
| 5         | 14.69  | 3 | g     |
| 6         | 14.35  | 3 | g     |
| 7         | 110.24 | 3 | c     |
| 8         | 18.71  | 3 | fg    |
| 9         | 22.29  | 3 | fg    |
| 10        | 21.05  | 3 | fg    |
| 11        | 9.70   | 3 | g     |
| 12        | 15.34  | 3 | fg    |
| 13        | 12.97  | 3 | g     |
| 14        | 106.18 | 3 | cd    |
| 15        | 100.57 | 3 | cde   |
| 16        | 17.98  | 3 | fg    |
| 17        | 22.67  | 3 | fg    |
| 18        | 19.10  | 3 | fg    |
| 19        | 54.67  | 3 | efg   |
| 20        | 60.96  | 3 | def   |

Means with the same letter are not significantly different.

ANALYSIS FOR RESPONSE VARIABLE: X10.DFW

Summary Information

| FACTOR      | NO. OF LEVELS | LEVELS        |
|-------------|---------------|---------------|
| Genotypes   | 20            | 1, 2, ..., 20 |
| Replication | 3             | 1, 2, 3       |

Number of Observations Read and Used: 60

ANOVA TABLE  
Response Variable: X10.DFW

| Source      | DF | Sum of Square | Mean Square | F Value | Pr(> F) |
|-------------|----|---------------|-------------|---------|---------|
| Replication | 2  | 2.9528        | 1.4764      | 3.87    | 0.0296  |
| Genotypes   | 19 | 2071.7972     | 109.0420    | 285.56  | 0.0000  |
| Error       | 38 | 14.5106       | 0.3819      |         |         |
| Total       | 59 | 2089.2606     |             |         |         |

Summary Statistics

| CV(%) | X10.DFW Mean |
|-------|--------------|
| 6.86  | 9.00         |

Standard Errors

| Effects     | StdErr |
|-------------|--------|
| Replication | 0.1954 |
| Genotypes   | 0.5046 |

Pairwise Mean Comparison of Genotypes

Tukeys's Honest Significant Difference (HSD) Test

|                          |        |
|--------------------------|--------|
| Alpha                    | 0.05   |
| Error Degrees of Freedom | 38     |
| Error Mean Square        | 0.3819 |
| Critical Value           | 5.3760 |
| Test Statistics          | 1.9180 |

Summary of the Result:

| Genotypes | means | N | group |
|-----------|-------|---|-------|
| 1         | 23.55 | 3 | a     |
| 2         | 19.29 | 3 | b     |
| 3         | 16.47 | 3 | c     |
| 4         | 3.72  | 3 | gh    |
| 5         | 4.35  | 3 | fg    |
| 6         | 4.45  | 3 | fg    |
| 7         | 12.39 | 3 | d     |
| 8         | 5.76  | 3 | f     |
| 9         | 3.80  | 3 | gh    |
| 10        | 4.41  | 3 | fg    |
| 11        | 2.38  | 3 | h     |
| 12        | 3.59  | 3 | gh    |
| 13        | 3.51  | 3 | gh    |
| 14        | 12.72 | 3 | d     |
| 15        | 12.02 | 3 | d     |
| 16        | 8.66  | 3 | e     |
| 17        | 4.53  | 3 | fg    |
| 18        | 8.61  | 3 | e     |
| 19        | 12.90 | 3 | d     |
| 20        | 12.94 | 3 | d     |

Means with the same letter are not significantly different.

=====

ANALYSIS FOR RESPONSE VARIABLE: FL

=====

Summary Information

| FACTOR      | NO. OF LEVELS | LEVELS        |
|-------------|---------------|---------------|
| Genotypes   | 20            | 1, 2, ..., 20 |
| Replication | 3             | 1, 2, 3       |

Number of Observations Read and Used: 60

ANOVA TABLE

Response Variable: FL

| Source      | DF | Sum of Square | Mean Square | F Value | Pr(> F) |
|-------------|----|---------------|-------------|---------|---------|
| Replication | 2  | 0.1475        | 0.0737      | 0.09    | 0.9157  |
| Genotypes   | 19 | 1126.3224     | 59.2801     | 70.98   | 0.0000  |
| Error       | 38 | 31.7366       | 0.8352      |         |         |
| Total       | 59 | 1158.2065     |             |         |         |

Summary Statistics

| CV(%) | FL Mean     |
|-------|-------------|
| 12.40 | <b>7.37</b> |

Standard Errors

| Effects     | StdErr |
|-------------|--------|
| Replication | 0.2890 |
| Genotypes   | 0.7462 |

Pairwise Mean Comparison of Genotypes

Tukeys's Honest Significant Difference (HSD) Test

|                          |        |
|--------------------------|--------|
| Alpha                    | 0.05   |
| Error Degrees of Freedom | 38     |
| Error Mean Square        | 0.8352 |
| Critical Value           | 5.3760 |
| Test Statistics          | 2.8365 |

Summary of the Result:

| Genotypes | means | N | group |
|-----------|-------|---|-------|
| 1         | 16.52 | 3 | a     |
| 2         | 14.46 | 3 | a     |
| 3         | 13.90 | 3 | a     |
| 4         | 5.51  | 3 | def   |
| 5         | 2.35  | 3 | g     |
| 6         | 3.15  | 3 | fg    |
| 7         | 16.25 | 3 | a     |
| 8         | 4.91  | 3 | fg    |
| 9         | 4.97  | 3 | fg    |
| 10        | 4.84  | 3 | fg    |
| 11        | 3.25  | 3 | fg    |
| 12        | 4.19  | 3 | fg    |
| 13        | 4.69  | 3 | fg    |
| 14        | 7.93  | 3 | bcde  |
| 15        | 8.43  | 3 | bc    |
| 16        | 5.62  | 3 | cdef  |
| 17        | 5.20  | 3 | ef    |
| 18        | 4.35  | 3 | fg    |
| 19        | 8.87  | 3 | b     |
| 20        | 8.05  | 3 | bcd   |

Means with the same letter are not significantly different.

**ANALYSIS FOR RESPONSE VARIABLE: FW**

Summary Information

| FACTOR      | NO. OF LEVELS | LEVELS        |
|-------------|---------------|---------------|
| Genotypes   | 20            | 1, 2, ..., 20 |
| Replication | 3             | 1, 2, 3       |

Number of Observations Read and Used: 60

ANOVA TABLE

Response Variable: FW

| Source      | DF | Sum of Square | Mean Square | F Value | Pr(> F) |
|-------------|----|---------------|-------------|---------|---------|
| Replication | 2  | 0.0359        | 0.0179      | 2.03    | 0.1456  |
| Genotypes   | 19 | 10.3631       | 0.5454      | 61.64   | 0.0000  |
| Error       | 38 | 0.3362        | 0.0088      |         |         |
| Total       | 59 | 10.7352       |             |         |         |

Summary Statistics

| CV(%) | FW Mean |
|-------|---------|
| 8.13  | 1.16    |

Standard Errors

| Effects     | StdErr |
|-------------|--------|
| Replication | 0.0297 |
| Genotypes   | 0.0768 |

Pairwise Mean Comparison of Genotypes

Tukeys's Honest Significant Difference (HSD) Test

|                          |        |
|--------------------------|--------|
| Alpha                    | 0.05   |
| Error Degrees of Freedom | 38     |
| Error Mean Square        | 0.0088 |
| Critical Value           | 5.3760 |
| Test Statistics          | 0.2920 |

Summary of the Result:

| Genotypes | means | N | group |
|-----------|-------|---|-------|
| 1         | 1.89  | 3 | a     |
| 2         | 1.91  | 3 | a     |
| 3         | 2.10  | 3 | a     |
| 4         | 0.74  | 3 | f     |
| 5         | 1.11  | 3 | cde   |
| 6         | 0.91  | 3 | ef    |
| 7         | 1.24  | 3 | bcd   |
| 8         | 0.85  | 3 | ef    |
| 9         | 0.94  | 3 | ef    |
| 10        | 0.90  | 3 | ef    |
| 11        | 0.69  | 3 | f     |
| 12        | 0.79  | 3 | f     |
| 13        | 0.70  | 3 | f     |
| 14        | 1.50  | 3 | b     |
| 15        | 1.50  | 3 | b     |
| 16        | 0.88  | 3 | ef    |
| 17        | 0.98  | 3 | def   |
| 18        | 0.96  | 3 | def   |
| 19        | 1.14  | 3 | cde   |
| 20        | 1.40  | 3 | bc    |

Means with the same letter are not significantly different.

=====

ANALYSIS FOR RESPONSE VARIABLE: NSF

=====

Summary Information

| FACTOR      | NO. OF LEVELS | LEVELS        |
|-------------|---------------|---------------|
| Genotypes   | 20            | 1, 2, ..., 20 |
| Replication | 3             | 1, 2, 3       |

Number of Observations Read and Used: 60

ANOVA TABLE

Response Variable: NSF

| Source      | DF | Sum of Square | Mean Square | F Value | Pr(> F) |
|-------------|----|---------------|-------------|---------|---------|
| Replication | 2  | 405.6333      | 202.8167    | 8.34    | 0.0010  |
| Genotypes   | 19 | 16798.1833    | 884.1149    | 36.35   | 0.0000  |
| Error       | 38 | 924.3667      | 24.3254     |         |         |
| Total       | 59 | 18128.1833    |             |         |         |

Summary Statistics

| CV(%) | NSF Mean |
|-------|----------|
| 8.07  | 61.12    |

Standard Errors

| Effects     | StdErr |
|-------------|--------|
| Replication | 1.56   |
| Genotypes   | 4.03   |

Pairwise Mean Comparison of Genotypes

Tukeys's Honest Significant Difference (HSD) Test

|                          |         |
|--------------------------|---------|
| Alpha                    | 0.05    |
| Error Degrees of Freedom | 38      |
| Error Mean Square        | 24.3254 |
| Critical Value           | 5.3760  |
| Test Statistics          | 15.3083 |



Summary of the Result:

| Genotypes | means | N | group |
|-----------|-------|---|-------|
| 1         | 67.00 | 3 | cd    |
| 2         | 69.00 | 3 | bcd   |
| 3         | 58.33 | 3 | defg  |
| 4         | 34.67 | 3 | ij    |
| 5         | 71.00 | 3 | bcd   |
| 6         | 73.67 | 3 | abc   |
| 7         | 72.33 | 3 | bcd   |
| 8         | 87.67 | 3 | a     |
| 9         | 45.67 | 3 | fghi  |
| 10        | 62.33 | 3 | cde   |
| 11        | 24.67 | 3 | j     |
| 12        | 44.67 | 3 | ghi   |
| 13        | 51.67 | 3 | efgh  |
| 14        | 36.67 | 3 | hij   |
| 15        | 57.67 | 3 | defg  |
| 16        | 84.00 | 3 | ab    |
| 17        | 60.33 | 3 | cdef  |
| 18        | 83.00 | 3 | ab    |
| 19        | 64.33 | 3 | cde   |
| 20        | 73.67 | 3 | abc   |

Means with the same letter are not significantly different.

ANALYSIS FOR RESPONSE VARIABLE: WSF

Summary Information

| FACTOR      | NO. OF LEVELS | LEVELS        |
|-------------|---------------|---------------|
| Genotypes   | 20            | 1, 2, ..., 20 |
| Replication | 3             | 1, 2, 3       |

Number of Observations Read and Used: 60

ANOVA TABLE

Response Variable: WSF

| Source      | DF | Sum of Square | Mean Square | F Value | Pr(> F) |
|-------------|----|---------------|-------------|---------|---------|
| Replication | 2  | 0.0204        | 0.0102      | 12.88   | 0.0001  |
| Genotypes   | 19 | 0.5574        | 0.0293      | 36.96   | 0.0000  |
| Error       | 38 | 0.0302        | 0.0008      |         |         |
| Total       | 59 | 0.6080        |             |         |         |

Summary Statistics

| CV(%) | WSF Mean |
|-------|----------|
| 9.45  | 0.2980   |

Standard Errors

| Effects     | StdErr |
|-------------|--------|
| Replication | 0.0089 |
| Genotypes   | 0.0230 |

Pairwise Mean Comparison of Genotypes

Tukeys's Honest Significant Difference (HSD) Test

|                          |        |
|--------------------------|--------|
| Alpha                    | 0.05   |
| Error Degrees of Freedom | 38     |
| Error Mean Square        | 0.0008 |
| Critical Value           | 5.3760 |
| Test Statistics          | 0.0874 |

Summary of the Result:

| Genotypes | means  | N | group |
|-----------|--------|---|-------|
| 1         | 0.3467 | 3 | cde   |
| 2         | 0.4233 | 3 | bc    |
| 3         | 0.3167 | 3 | def   |
| 4         | 0.1733 | 3 | hij   |
| 5         | 0.2667 | 3 | efg   |
| 6         | 0.3000 | 3 | def   |
| 7         | 0.4100 | 3 | bc    |
| 8         | 0.2667 | 3 | efg   |
| 9         | 0.2567 | 3 | fgh   |
| 10        | 0.3033 | 3 | def   |
| 11        | 0.1500 | 3 | j     |
| 12        | 0.1633 | 3 | ij    |
| 13        | 0.2100 | 3 | ghij  |
| 14        | 0.2333 | 3 | fghij |
| 15        | 0.2433 | 3 | fghi  |
| 16        | 0.4433 | 3 | ab    |
| 17        | 0.2533 | 3 | fgh   |
| 18        | 0.5300 | 3 | a     |
| 19        | 0.3133 | 3 | def   |
| 20        | 0.3567 | 3 | bcd   |

Means with the same letter are not significantly different.

=====

ANALYSIS FOR RESPONSE VARIABLE: NFP

=====

Summary Information

| FACTOR      | NO. OF LEVELS | LEVELS        |
|-------------|---------------|---------------|
| Genotypes   | 20            | 1, 2, ..., 20 |
| Replication | 3             | 1, 2, 3       |

Number of Observations Read and Used: 60

ANOVA TABLE

Response Variable: NFP

| Source      | DF | Sum of Square | Mean Square | F Value | Pr(> F) |
|-------------|----|---------------|-------------|---------|---------|
| Replication | 2  | 354.6333      | 177.3167    | 0.73    | 0.4892  |
| Genotypes   | 19 | 304786.9833   | 16041.4202  | 65.92   | 0.0000  |
| Error       | 38 | 9247.3667     | 243.3518    |         |         |
| Total       | 59 | 314388.9833   |             |         |         |

Summary Statistics

| CV(%) | NFP Mean |
|-------|----------|
| 17.08 | 91.32    |

Standard Errors

| Effects     | StdErr |
|-------------|--------|
| Replication | 4.93   |
| Genotypes   | 12.74  |

Pairwise Mean Comparison of Genotypes

Tukeys's Honest Significant Difference (HSD) Test

|                          |          |
|--------------------------|----------|
| Alpha                    | 0.05     |
| Error Degrees of Freedom | 38       |
| Error Mean Square        | 243.3518 |
| Critical Value           | 5.3760   |
| Test Statistics          | 48.4188  |

Summary of the Result:

| Genotypes | means  | N | group |
|-----------|--------|---|-------|
| 1         | 25.67  | 3 | f     |
| 2         | 22.00  | 3 | f     |
| 3         | 21.67  | 3 | f     |
| 4         | 266.67 | 3 | a     |
| 5         | 75.33  | 3 | cde   |
| 6         | 82.67  | 3 | cd    |
| 7         | 28.33  | 3 | ef    |
| 8         | 90.33  | 3 | cd    |
| 9         | 69.33  | 3 | cdef  |
| 10        | 54.33  | 3 | def   |
| 11        | 252.33 | 3 | a     |
| 12        | 177.00 | 3 | b     |
| 13        | 193.00 | 3 | b     |
| 14        | 53.67  | 3 | def   |
| 15        | 80.67  | 3 | cd    |
| 16        | 48.67  | 3 | def   |
| 17        | 49.33  | 3 | def   |
| 18        | 66.00  | 3 | cdef  |
| 19        | 110.00 | 3 | c     |
| 20        | 59.33  | 3 | def   |

Means with the same letter are not significantly different.

ANALYSIS FOR RESPONSE VARIABLE: X100.SW

Summary Information

| FACTOR      | NO. OF LEVELS | LEVELS        |
|-------------|---------------|---------------|
| Genotypes   | 20            | 1, 2, ..., 20 |
| Replication | 3             | 1, 2, 3       |

Number of Observations Read and Used: 60

ANOVA TABLE

Response Variable: X100.SW

| Source      | DF | Sum of Square | Mean Square | F Value | Pr(> F) |
|-------------|----|---------------|-------------|---------|---------|
| Replication | 2  | 0.0199        | 0.0099      | 16.28   | 0.0000  |
| Genotypes   | 19 | 0.7155        | 0.0377      | 61.69   | 0.0000  |
| Error       | 38 | 0.0232        | 0.0006      |         |         |
| Total       | 59 | 0.7586        |             |         |         |

Summary Statistics

| CV(%) | X100.SW Mean |
|-------|--------------|
| 5.01  | 0.4935       |

Standard Errors

| Effects     | StdErr |
|-------------|--------|
| Replication | 0.0078 |
| Genotypes   | 0.0202 |

Pairwise Mean Comparison of Genotypes

Tukeys's Honest Significant Difference (HSD) Test

|                          |        |
|--------------------------|--------|
| Alpha                    | 0.05   |
| Error Degrees of Freedom | 38     |
| Error Mean Square        | 0.0006 |
| Critical Value           | 5.3760 |
| Test Statistics          | 0.0767 |

Summary of the Result:

| Genotypes | means  | N group |
|-----------|--------|---------|
| 1         | 0.5867 | 3 abc   |
| 2         | 0.6567 | 3 a     |
| 3         | 0.5500 | 3 cde   |
| 4         | 0.5033 | 3 def   |
| 5         | 0.4433 | 3 fgh   |
| 6         | 0.4333 | 3 fgh   |
| 7         | 0.4733 | 3 efg   |
| 8         | 0.4033 | 3 gh    |
| 9         | 0.2500 | 3 i     |
| 10        | 0.5000 | 3 def   |
| 11        | 0.2733 | 3 i     |
| 12        | 0.3900 | 3 h     |
| 13        | 0.4500 | 3 fgh   |
| 14        | 0.6567 | 3 a     |
| 15        | 0.5700 | 3 bcd   |
| 16        | 0.6333 | 3 ab    |
| 17        | 0.4533 | 3 fgh   |
| 18        | 0.5100 | 3 cdef  |
| 19        | 0.5767 | 3 bcd   |
| 20        | 0.5567 | 3 bcd   |

Means with the same letter are not significantly different.

=====

ANALYSIS FOR RESPONSE VARIABLE: FYP

=====

Summary Information

| FACTOR      | NO. OF LEVELS | LEVELS        |
|-------------|---------------|---------------|
| Genotypes   | 20            | 1, 2, ..., 20 |
| Replication | 3             | 1, 2, 3       |

Number of Observations Read and Used: 60

ANOVA TABLE

Response Variable: FYP

| Source      | DF | Sum of Square | Mean Square | F Value | Pr(> F) |
|-------------|----|---------------|-------------|---------|---------|
| Replication | 2  | 740.6133      | 370.3066    | 0.09    | 0.9161  |
| Genotypes   | 19 | 2952118.9516  | 155374.6817 | 36.84   | 0.0000  |
| Error       | 38 | 160286.3589   | 4218.0621   |         |         |
| Total       | 59 | 3113145.9237  |             |         |         |

Summary Statistics

| CV(%) | FYP Mean |
|-------|----------|
| 19.44 | 334.15   |

Standard Errors

| Effects     | StdErr |
|-------------|--------|
| Replication | 20.54  |
| Genotypes   | 53.03  |

Pairwise Mean Comparison of Genotypes

Tukeys's Honest Significant Difference (HSD) Test

|                          |           |
|--------------------------|-----------|
| Alpha                    | 0.05      |
| Error Degrees of Freedom | 38        |
| Error Mean Square        | 4218.0621 |
| Critical Value           | 5.3760    |
| Test Statistics          | 201.5827  |

Summary of the Result:

---

| Genotypes | means  | N | group |
|-----------|--------|---|-------|
| 1         | 648.67 | 3 | ab    |
| 2         | 483.29 | 3 | bcd   |
| 3         | 606.62 | 3 | ab    |
| 4         | 528.98 | 3 | bc    |
| 5         | 108.36 | 3 | fg    |
| 6         | 117.93 | 3 | fg    |
| 7         | 306.69 | 3 | def   |
| 8         | 155.44 | 3 | fg    |
| 9         | 134.91 | 3 | fg    |
| 10        | 114.25 | 3 | fg    |
| 11        | 248.99 | 3 | efg   |
| 12        | 268.35 | 3 | efg   |
| 13        | 246.75 | 3 | efg   |
| 14        | 606.14 | 3 | ab    |
| 15        | 804.57 | 3 | a     |
| 16        | 97.82  | 3 | g     |
| 17        | 108.27 | 3 | fg    |
| 18        | 125.32 | 3 | fg    |
| 19        | 588.82 | 3 | b     |
| 20        | 382.74 | 3 | cde   |

---

Means with the same letter are not significantly different.
